# Supplementary material for: Two-layer cascaded catalytic hairpin assemblies based on locked nucleic acids for one-step and highly sensitive ctDNA detection
Source: Royal Society of Chemistry journal article supplement (doi:10.1039/d4ay00611a), 2024-01-01
Supplement: d4ay00611a1.pdf [file d4ay00611a1.pdf]

Supporting Information

## **Two-layer cascaded catalytic hairpin assemblies based on locked nucleic acids for one-step and highly sensitive ctDNA detection**

Kaiyue Tan,<sup>a,b,c</sup> Longsheng Chen,<sup>a,b,c</sup> Donglin Cao,<sup>d</sup> Wei Xiao,<sup>d</sup> Qian Lv<sup>a,b,c</sup> and Lili Zou<sup>a,b,c\*</sup>

<sup>a</sup>National Engineering Research Center for Healthcare Devices, Institute of Biological and Medical Engineering, Guangdong Academy of Sciences, Guangzhou 510316, China. E-mail: lilizou@mail.ustc.edu.cn

<sup>b</sup>Guangdong Engineering Technology Research Center for Diagnosis and Rehabilitation of Dementia, Guangzhou 510316, China

<sup>c</sup>Guangdong Provincial Key Laboratory of Medical Electronic Instruments and Polymer Material Products, Guangzhou 510316, China

<sup>d</sup>Department of Laboratory Medicine, Guangdong Provincial Key Laboratory of Point-of-care Testing (POCT), Guangdong Second Provincial General Hospital, Guangzhou, 510500, China

## Table of Contents

|                                                                                                   |     |
|---------------------------------------------------------------------------------------------------|-----|
| <b>Table S1.</b> The used sequences in the two-layer LNA-assisted CHA circuits .....              | S3  |
| <b>Fig. S1</b> The two-layer LNA-assisted CHA circuits triggered by target ctDNA.....             | S4  |
| <b>Fig. S2</b> The reporter design of the two-layer LNA-assisted CHA circuits .....               | S5  |
| <b>Fig. S3</b> Concentration optimization of the two-layer LNA-assisted CHA circuits .....        | S6  |
| <b>Fig. S4</b> Reaction temperature optimization of the two-layer LNA-assisted CHA circuits ..... | S7  |
| <b>Fig. S5</b> Reaction time optimization of the two-layer LNA-assisted CHA circuits .....        | S8  |
| <b>Fig. S6</b> Different LNA-modifications within the hairpins .....                              | S9  |
| <b>Fig. S7</b> Comparison of LNA-incorporated and regular cascaded CHA circuits .....             | S10 |
| <b>Fig. S8</b> Comparison of one-layer and two-layer LNA-assisted CHA circuits .....              | S11 |
| <b>Fig. S9</b> Fluorescence analysis of the circuits in the absence of hairpin component .....    | S12 |
| <b>Fig. S10</b> Fluorescence changes of the circuits in different ratios of serum.....            | S13 |
| <b>Fig. S11</b> Comparison of two-layer LNA-assisted CHA circuits and PCR method.....             | S14 |
| <b>Table S2.</b> Test results of two-layer LNA-assisted CHA circuits and PCR method. ....         | S15 |
| <b>References.</b> .....                                                                          | S16 |

**Table S1** The oligonucleotide sequences in the two-layer cascade LNA-assisted CHA circuits.

| Name                                  | Sequence(5'-3')                                                                                             |
|---------------------------------------|-------------------------------------------------------------------------------------------------------------|
| <b>PIK3CA E542K</b><br>(Target ctDNA) | CTCAGTGA(3*) TTTTAGA(2*) GAGAGGAT(1*)                                                                       |
| <b>DNA-H<sub>1</sub></b>              | ATCCTCTC(1) TCTAAAA(2) TCACTGAG(3) CCATGTGTAGA(4*)<br>CTCAGTGA(3*) TTTTAGA(2*) CCTTGTCA(5*) TAGAGCAC(6*)    |
| <b>H<sub>1</sub></b>                  | ATCCTCTC(1) TCTAAAA(2) TCACTGAG(3) CCATGTGTAGA(4*)<br>CTCAGTGA(3*) TTTTAGA(2*) CCTTGTCA(5*) TAGAGCAC(6*)    |
| <b>H<sub>1-S</sub></b>                | ATCCTCTC(1) TCTAAAA(2) TCACTGAG(3) CCATGTGTAGA(4*)<br>CTCAGTGA(3*) TTTTAGA(2*) CCTTGTCA(5*) TAGAGCAC(6*)    |
| <b>H<sub>1-R</sub></b>                | ATCCTCTC(1) TCTAAAA(2) TCACTGAG(3) CCATGTGTAGA(4*)<br>CTCAGTGA(3*) TTTTAGA(2*) CCTTGTCA(5*) TAGAGCAC(6*)    |
| <b>DNA-H<sub>2</sub></b>              | TCACTGAG(3) TCTACACATGG(4) CTCAGTGA(3*) TTTTAGA(2*)<br>CCATGTGTAGA(4*)                                      |
| <b>H<sub>2</sub></b>                  | TCACTGAG(3) TCTACACATGG(4) CTCAGTGA(3*) TTTTAGA(2*)<br>CCATGTGTAGA(4*)                                      |
| <b>DNA-H<sub>3</sub></b>              | GAAATCGG(9) GTGTAGTC(8) CCTTGTCA(5*) TAGAGCAC(6*)<br>GCACCTCCTATATCG(7*) GTGCTCTA(6) TGACAAGG(5) TCTAAAA(2) |
| <b>H<sub>3</sub></b>                  | GAAATCGG(9) GTGTAGTC(8) CCTTGTCA(5*) TAGAGCAC(6*)<br>GCACCTCCTATATCG(7*) GTGCTCTA(6) TGACAAGG(5) TCTAAAA(2) |
| <b>DNA-H<sub>4</sub></b>              | GCACCTCCTATATCG(7*) CCTTGTCA(5*) TAGAGCAC(6*)<br>CGATATAGGAGGTGC(7) GTGCTCTA(6)                             |
| <b>H<sub>4</sub></b>                  | GCACCTCCTATATCG(7*) CCTTGTCA(5*) TAGAGCAC(6*)<br>CGATATAGGAGGTGC(7) GTGCTCTA(6)                             |
| <b>Rep-F</b>                          | TGACAAGG(5) GACTACAC(8*) CCGATTTCCCAT(9*)-FAM                                                               |
| <b>Regular Rep-F</b>                  | TGACAAGG(5) GACTACAC(8*) CCGATTTCCCAT(9*)-FAM                                                               |
| <b>Rep-Q</b>                          | BHQ-1-ATGGGAAATCGG(9) GTGTAGTC(8)                                                                           |
| <b>KRAS G12DM</b>                     | ACT CTT GCC TAC GCC ATC AGC TCC AAC TAC CAC AAG TTT                                                         |
| <b>EGFR L858R</b>                     | CAG CAG TTT GGC CAG CCC AAA ATC TGT GAT CTT GAC ATG                                                         |
| <b>BRAF V600E</b>                     | GAT TTT GGT CTA GCT ACA GAG AAA TCT CGA TGG AGT GGG                                                         |
| <b>1-Mut</b>                          | CTC AGT GAT TTA AGA GAG AGG AT                                                                              |
| <b>2-Mut</b>                          | CTC AGT GAT TTA AGA GTG AGG AT                                                                              |
| <b>3-Mut</b>                          | CTC AGA GAT TTA AGA GTG AGG AT                                                                              |
| <b>Rep-F (one-layer)</b>              | FAM-CGA GTGCTCTA TGACAAGG TCTAAAA                                                                           |
| <b>Rep-Q (one-layer)</b>              | CCTTGTCA TAGAGCAC TCG-BHQ-1                                                                                 |

All the designed oligonucleotide sequences were analyzed and optimized using a NUPACK software.<sup>1</sup> Red letters represented the locked nucleic acid (LNA) base.

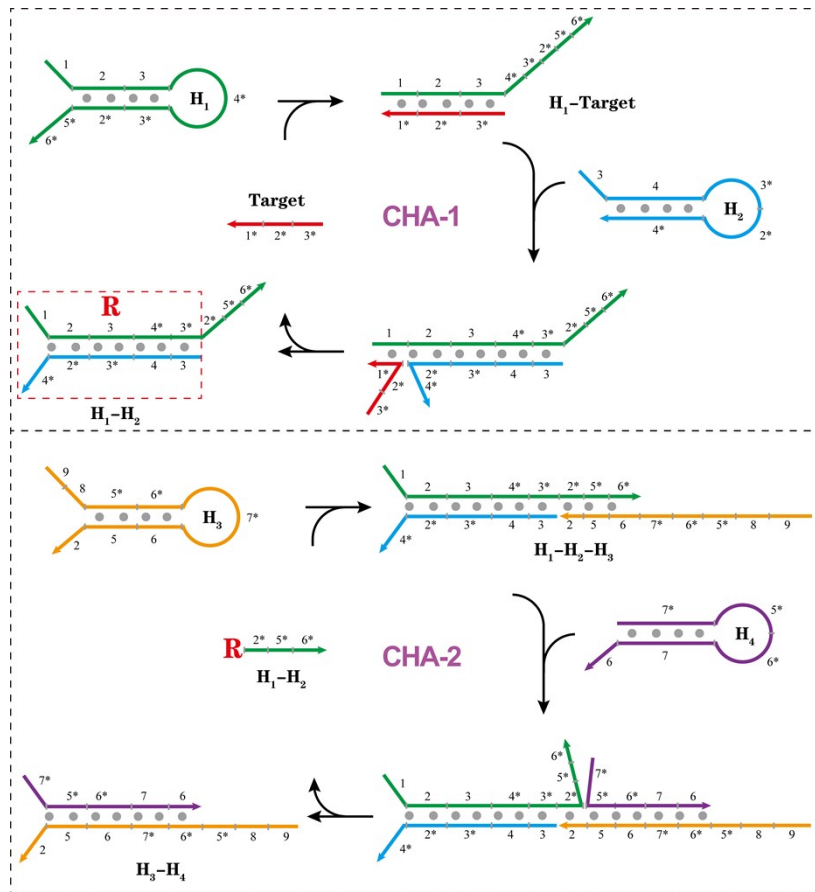

**Fig. S1** Proposed response process of the two-layer cascaded LNA-assisted CHA circuits to target ctDNA. Arrows represented the 3'-termini of strands. Gray circles represented base-pairing of hybridized duplex. The numbers of domains and the corresponding asterisks were complementary. Short gray dashes represented the junctions between domains.

The circuits included four hairpins ( $H_1$ ,  $H_2$ ,  $H_3$  and  $H_4$ ) and the fluorophore (FAM)/quencher (BHQ-1) pair labelled reporter, and these hairpins and reporter were respectively modified two pairs of LNAs near its stem-end. The target ctDNA firstly hybridized with the toehold domain 1 of  $H_1$  to initiate a toehold-mediated strand displacement, leading to the formation of  $H_1$ -target hybrid through domain hybridization (1-2-3 and  $3^*-2^*-1^*$ ). Then, the exposed sequence  $3^*$  of  $H_1$ -target complex hybridized with the toehold 3 of hairpin  $H_2$  to initiate a branch-migration, continuously generating a  $H_1$ - $H_2$  duplex as another catalyst for the second layer CHA reaction and releasing the target ctDNA for multiple cycles in first layer CHA reaction. Therefore, the exposed domain  $2^*$  of  $H_1$ - $H_2$  complex hybridized with the toehold 2 of hairpin  $H_3$  to initiate a toehold-mediated strand displacement, leading to the formation of  $H_1$ - $H_2$ - $H_3$  hybrid. And the newly exposed sequence  $6^*$  of  $H_1$ - $H_2$ - $H_3$  complex docked to the toehold 6 of hairpin  $H_4$  via branch-migration, continuously generating a  $H_3$ - $H_4$  duplex and releasing the  $H_1$ - $H_2$  complex for multiple cycles in second layer CHA reaction.

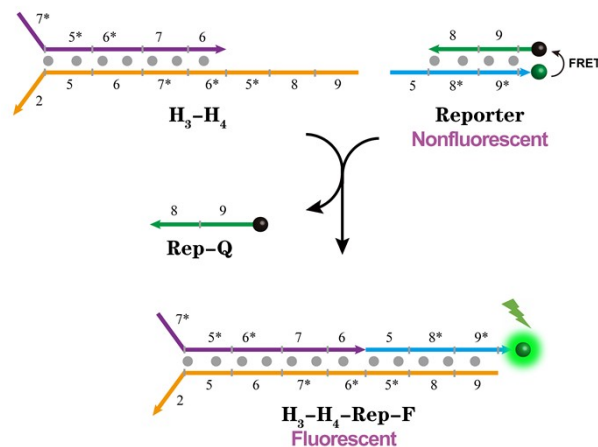

**Fig. S2** Fluorescence response process of reporter in the two-layer LNA-assisted CHA circuits. The reporter was consisted of four LNAs-incorporated duplex, and respectively labeled with FAM (Rep-F) and BHQ-1 (Rep-Q). The FAM denoted 6-carboxy fluorescein, and BHQ-1 denoted Black Hole Quencher-1. The newly exposed domain 5\* of  $H_3-H_4$  complex further hybridized with the domain 5 of reporter, resulting the separation of Rep-Q and fluorescence recovery.

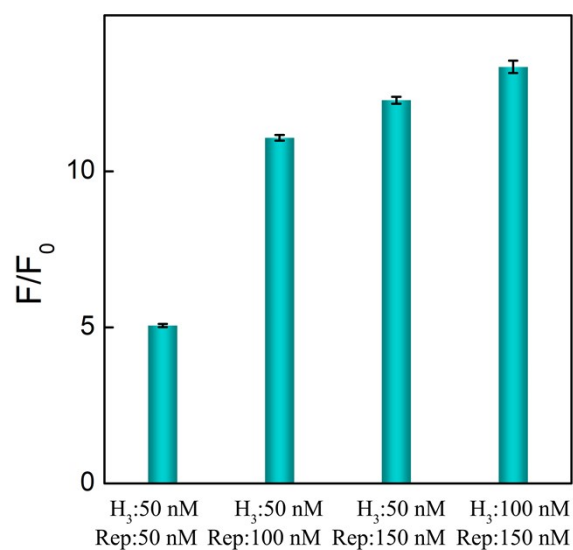

**Fig. S3** Fluorescence response of the two-layer LNA-assisted CHA circuits to target ctDNA in the different combinations of hairpin concentrations for 80 min at 25°C. The used concentration included target ctDNA (0.5 nM), H<sub>1</sub> (50 nM), H<sub>2</sub> (100 nM), H<sub>3</sub> (50 nM, 100 nM), H<sub>4</sub> (200 nM) and reporter (50 nM, 100 nM, 150 nM). F and F<sub>0</sub> represented the fluorescence intensity with and without target ctDNA, respectively. Results are presented as means ± standard deviation (SD) (n=3).

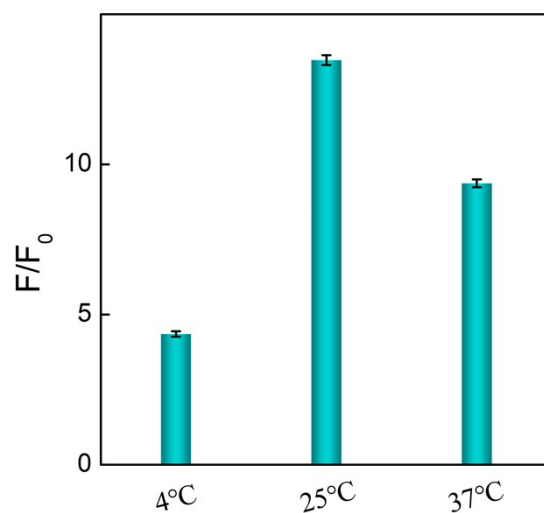

**Fig. S4** Fluorescence response of the two-layer LNA-assisted CHA circuits to target ctDNA for 80 min under different temperature conditions. The used concentration included target ctDNA (0.5 nM), H<sub>1</sub> (50 nM), H<sub>2</sub> (100 nM), H<sub>3</sub> (100 nM), H<sub>4</sub> (200 nM) and reporter (150 nM). F and F<sub>0</sub> represented the fluorescence intensity with and without target ctDNA, respectively. Results are presented as means ± standard deviation (SD) (n=3).

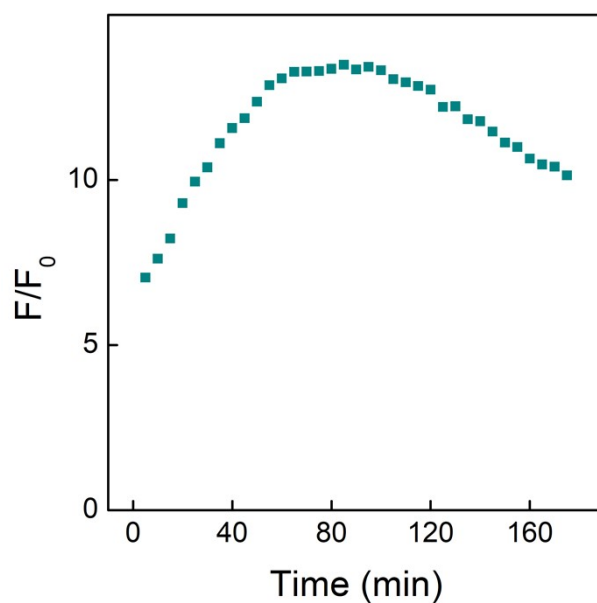

**Fig. S5** Fluorescence kinetics of the two-layer LNA-assisted CHA circuits in the presence of target ctDNA at 25°C. The used concentrations included target ctDNA (0.5 nM), H<sub>1</sub> (50 nM), H<sub>2</sub> (100 nM), H<sub>3</sub> (100 nM), H<sub>4</sub> (200 nM), and reporter (150 nM). F and F<sub>0</sub> represented the fluorescence intensity with and without target ctDNA, respectively.



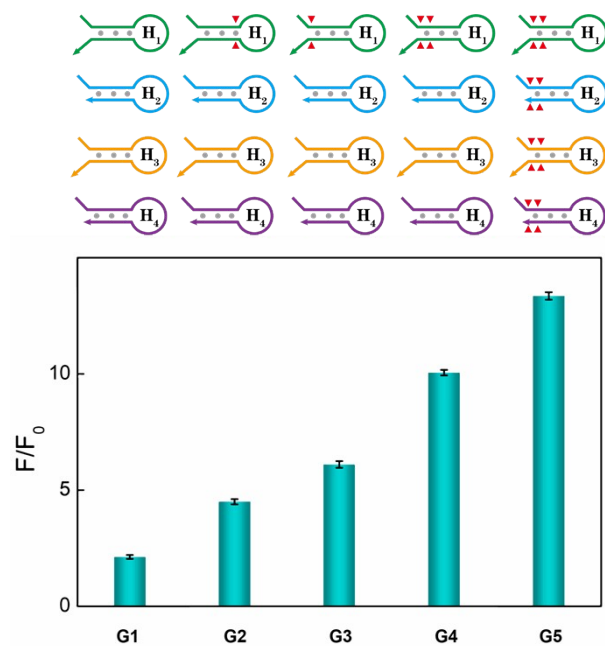

**Fig. S6** Fluorescence response of the two-layer LNA-assisted CHA circuits to target ctDNA after introducing different groups of LNA-incorporated hairpins for 80 min at 25°C. The used concentration included target ctDNA (0.5 nM), H<sub>1</sub> (50 nM), H<sub>2</sub> (100 nM), H<sub>3</sub> (100 nM), H<sub>4</sub> (200 nM) and reporter (150 nM). F and F<sub>0</sub> represented the fluorescence intensity with and without target ctDNA, respectively. Results are presented as means ± standard deviation (SD) (n=3).

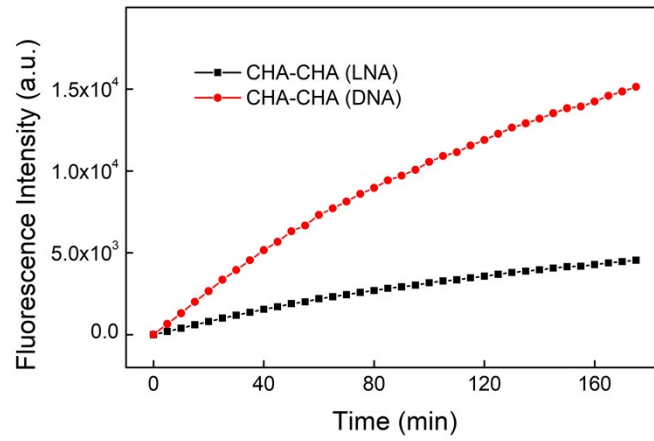

**Fig. S7** Fluorescence kinetics of the two-layer LNA-assisted CHA circuits and the two-layer regular CHA circuits in MCF-7 cell lysate at 25°C. The used concentration included H<sub>1</sub> (50 nM), H<sub>2</sub> (100 nM), H<sub>3</sub> (100 nM), H<sub>4</sub> (200 nM) and reporter (150 nM).

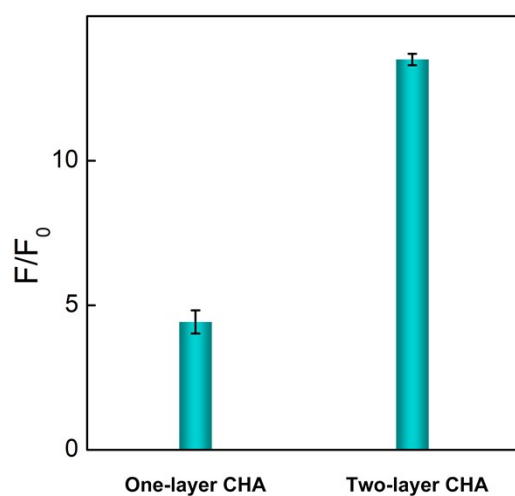

**Fig. S8** Fluorescence response of one-layer and two-layer LNA-assisted CHA circuits to target ctDNA for 80 min at 25°C.  $F$  and  $F_0$  represented the fluorescence intensity with and without target ctDNA, respectively. The used concentration included target ctDNA (0.5 nM),  $H_1$  (50 nM),  $H_2$  (100 nM),  $H_3$  (100 nM),  $H_4$  (200 nM) and reporter (150 nM). Results are presented as means  $\pm$  standard deviation (SD) ( $n=3$ ).

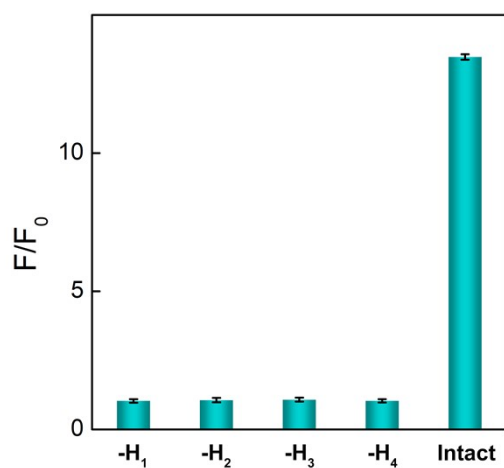

**Fig. S9** (a) Fluorescence response of the two-layer LNA-assisted CHA circuits subtracted by  $H_1$  alone,  $H_2$  alone,  $H_3$  alone, or  $H_4$  alone, and the intact system for 80 min at 25°C. The used concentration included target ctDNA (0.5 nM),  $H_1$  (50 nM),  $H_2$  (100 nM),  $H_3$  (100 nM),  $H_4$  (200 nM) and reporter (150 nM).  $F$  and  $F_0$  represented the fluorescence intensity with and without target ctDNA, respectively. Results are presented as means  $\pm$  standard deviation (SD) ( $n=3$ ).

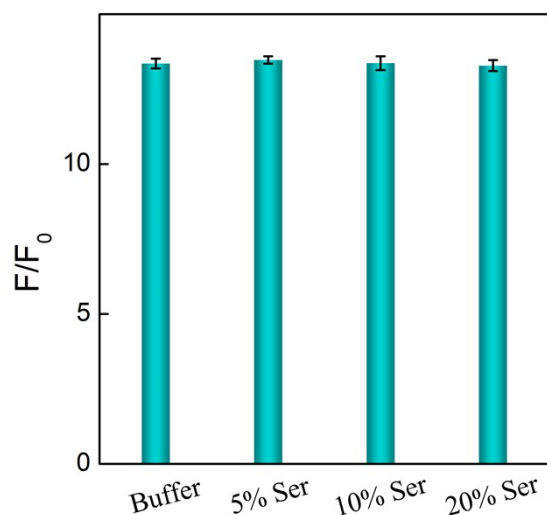

**Fig. S10** Fluorescence response of the two-layer LNA-assisted CHA circuits to target ctDNA in different ratios of fetal bovine serums (buffer, 5% serum, 10% serum, and 20% serum) for 80 min at 25°C. The used concentration included target ctDNA (0.5 nM), H<sub>1</sub> (50 nM), H<sub>2</sub> (100 nM), H<sub>3</sub> (100 nM), H<sub>4</sub> (200 nM) and reporter (150 nM). F and F<sub>0</sub> represented the fluorescence intensity with and without target ctDNA, respectively. Results are presented as means ± standard deviation (SD) (n=3).

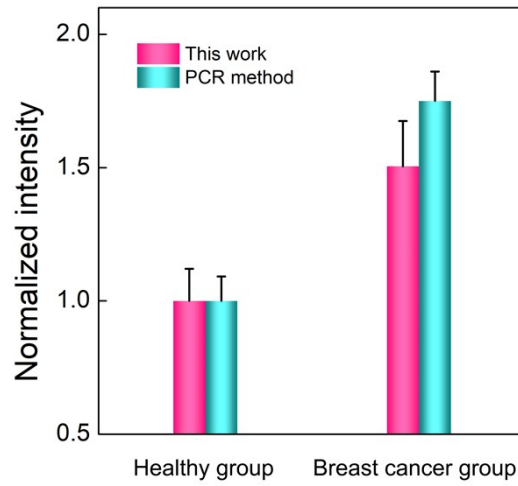

**Fig. S11** Clinical samples ctDNA analysis of the two-layer LNA-assisted CHA circuits and commercial PCR method. Normalization is performed against healthy group. Results are presented as means  $\pm$  standard deviation (SD) (n=3).

**Table S2.** The test results of 15 healthy donors and 15 breast cancer patients detected by two-layer LNA-assisted CHA circuits and PCR method.

| Samples                                   | Proposed method                          | PCR method                               |
|-------------------------------------------|------------------------------------------|------------------------------------------|
| Serum samples from healthy donors         | Normalized intensity (F/F <sub>0</sub> ) | Normalized intensity (F/F <sub>0</sub> ) |
| 1                                         | 0.95                                     | 0.99                                     |
| 2                                         | 1.05                                     | 1.03                                     |
| 3                                         | 1.01                                     | 1.02                                     |
| 4                                         | 0.95                                     | 0.97                                     |
| 5                                         | 1.02                                     | 1.01                                     |
| 6                                         | 0.92                                     | 0.98                                     |
| 7                                         | 1.12                                     | 1.06                                     |
| 8                                         | 1.01                                     | 1.04                                     |
| 9                                         | 1.04                                     | 1.02                                     |
| 10                                        | 0.89                                     | 0.97                                     |
| 11                                        | 0.93                                     | 0.96                                     |
| 12                                        | 1.01                                     | 1.02                                     |
| 13                                        | 0.97                                     | 1.01                                     |
| 14                                        | 0.91                                     | 0.99                                     |
| 15                                        | 0.96                                     | 1.03                                     |
| Serum samples from breast cancer patients | Normalized intensity (F/F <sub>0</sub> ) | Normalized intensity (F/F <sub>0</sub> ) |
| 1                                         | 1.15                                     | 1.54                                     |
| 2                                         | 1.25                                     | 1.61                                     |
| 3                                         | 1.45                                     | 1.76                                     |
| 4                                         | 1.75                                     | 1.85                                     |
| 5                                         | 1.55                                     | 1.69                                     |
| 6                                         | 1.55                                     | 1.73                                     |
| 7                                         | 1.23                                     | 1.82                                     |
| 8                                         | 2.45                                     | 2.68                                     |
| 9                                         | 1.74                                     | 1.85                                     |
| 10                                        | 1.25                                     | 1.66                                     |
| 11                                        | 1.95                                     | 2.12                                     |
| 12                                        | 1.24                                     | 1.73                                     |
| 13                                        | 1.03                                     | 1.46                                     |
| 14                                        | 1.33                                     | 1.58                                     |
| 15                                        | 1.65                                     | 1.83                                     |

## References

1. J. N. Zadeh, C. D. Steenberg, J. S. Bois, B. R. Wolfe, M. B. Pierce, A. R. Khan, R. M. Dirks and N. A. Pierce, *J. Comput. Chem.*, 2011, **32**, 170-173.
